# Supplementary material for: IL-6 influences the polarization of macrophages and the formation and growth of colorectal tumor
Source: PubMed Central journal article supplement (PMC5915127; doi:10.18632/oncotarget.24734), 2018-04-03
Supplement: oncotarget-09-17443-s001.pdf [file oncotarget-09-17443-s001.pdf]

## **IL-6 influences the polarization of macrophages and the formation and growth of colorectal tumor**

### **SUPPLEMENTARY MATERIALS**

**Supplementary Table 1: Cytokine profiles of NIH3T3/p3.1 and NIH3T3/Src cells. See\_ Supplementary\_Table 1.**
